# Supplementary material for: Controllable dynamics of oxygen vacancies through extrinsic doping for superior catalytic activities
Source: Royal Society of Chemistry journal article supplement (doi:10.1039/c8nr03801e), 2018-01-01
Supplement: c8nr03801e1.pdf [file c8nr03801e1.pdf]

## Controllable Dynamics of Oxygen Vacancies through Extrinsic Doping for Superior Catalytic Activities

Adnan Younis<sup>a\*</sup>, Sagar E. Shirsath<sup>a</sup>, Babar Shabbir<sup>b,c</sup> and Sean Li<sup>a</sup>

<sup>a</sup>*School of Materials Science and Engineering, University of New South Wales, Sydney, 2052, NSW, Australia*

<sup>b</sup>*Department of Materials Science and Engineering, Monash University, Clayton, Victoria, Australia*

<sup>c</sup>*College of Electronic Science and Technology and College of Optoelectronics Engineering, Shenzhen University, Shenzhen, P. R. China*

\*Corresponding Author: [a.younis@unsw.edu.au](mailto:a.younis@unsw.edu.au)

### Supporting Information

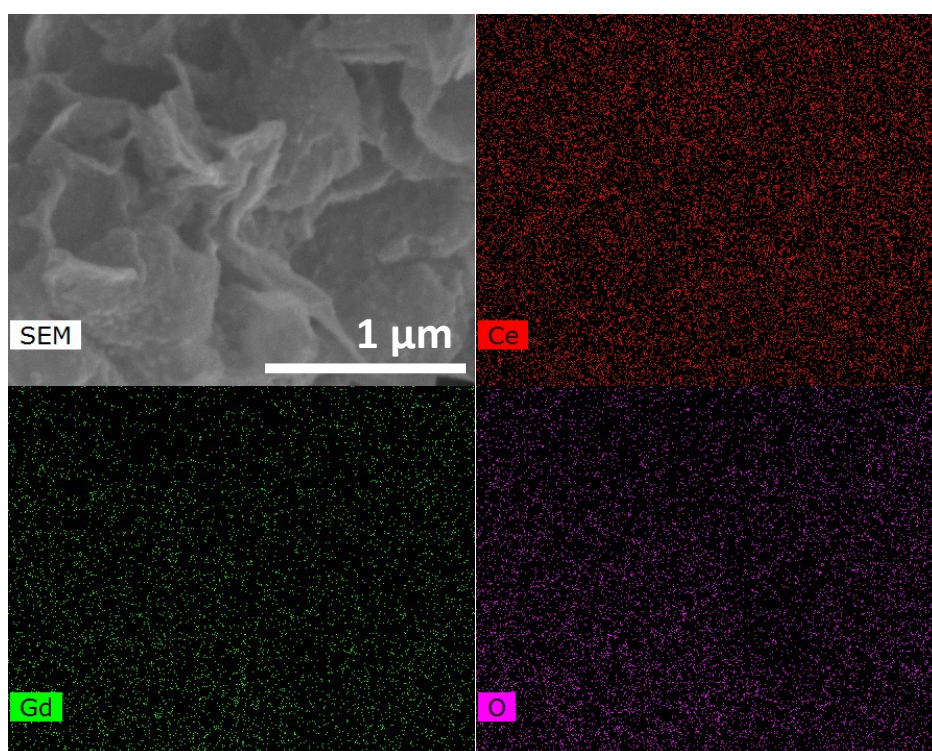

Figure S1: SEM-EDX mapping images of the GDC-15 sample, showing random distribution of Gd, Ce and O.

| <b>Sample Name</b> | <b>Ce Atom%<br/>(Set)</b> | <b>Gd (Atom%<br/>(Set)</b> | <b>Ce Atom% (EDS)</b> | <b>Gd (Atom%<br/>(EDS)</b> |
|--------------------|---------------------------|----------------------------|-----------------------|----------------------------|
| <b>GDC-05</b>      | 95                        | 05                         | 94.00                 | 6.00                       |
| <b>GDC-10</b>      | 90                        | 10                         | 88.7                  | 11.3                       |
| <b>GDC-15</b>      | 85                        | 15                         | 84.0                  | 16.0                       |
| <b>GDC-20</b>      | 80                        | 20                         | 78.5                  | 21.5                       |
| <b>GDC-25</b>      | 75                        | 25                         | 76.00                 | 24.0                       |
| <b>GDC-30</b>      | 70                        | 30                         | 67.0                  | 33.0                       |

Table T1: The compositions of the as-prepared samples were determined by Energy Dispersive X-ray spectra. The results are generally consistent with the expected ratio between Ce and Gd.

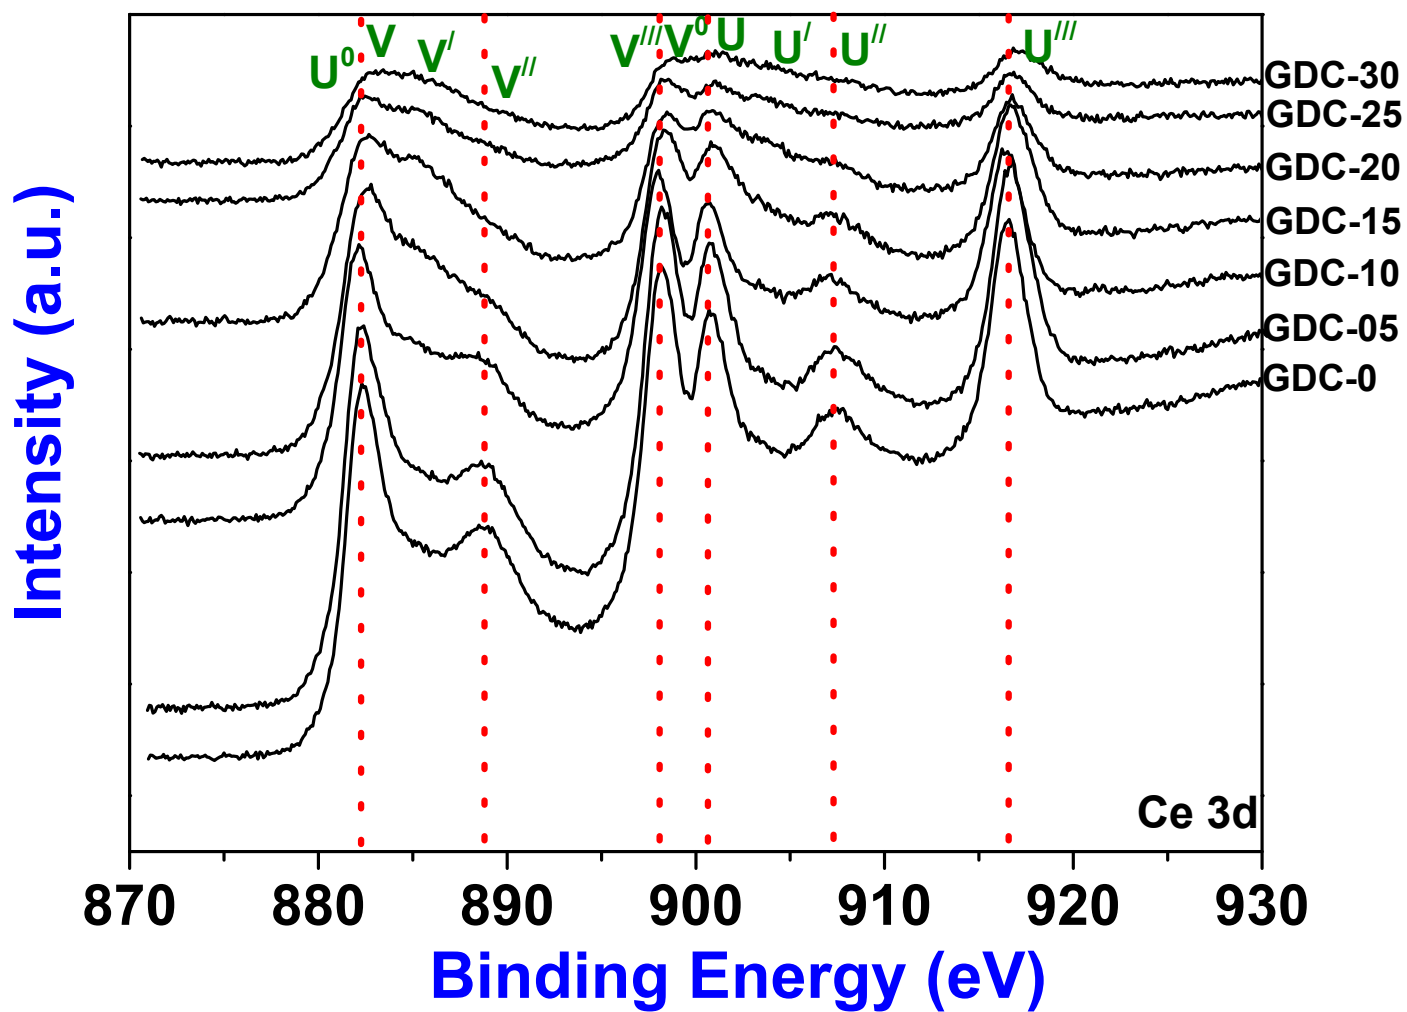

Figure S2: XPS spectra of Ce 3d of Gd-doped CeO<sub>2</sub> samples with different ratios of Ce:Gd.

UV-vis diffuse reflectance spectroscopy

To extract the surface coordination and oxidation states of metal ions (Ce ions) in as-prepared three samples (GDC-0, GDC-15 and GDC-30), UV-vis diffuse reflectance spectroscopy was carried out and the results are depicted in figure S3. The maxima appeared at 255 nm correspond to  $O^{2-}$  to  $Ce^{3+}$  charge transfer transitions, whereas the maximum at 285 nm and 340 nm may be due to  $O^{2-}$  to  $Ce^{4+}$  charge transfer and interband transitions[1]. The increased absorption intensity with Gd doping level indicates that the  $Ce^{4+}$  substitution with  $Gd^{3+}$  ions indeed facilitates the formation of  $Ce^{3+}$ , which generates more oxygen vacancies in the samples for charge compensation mechanism.

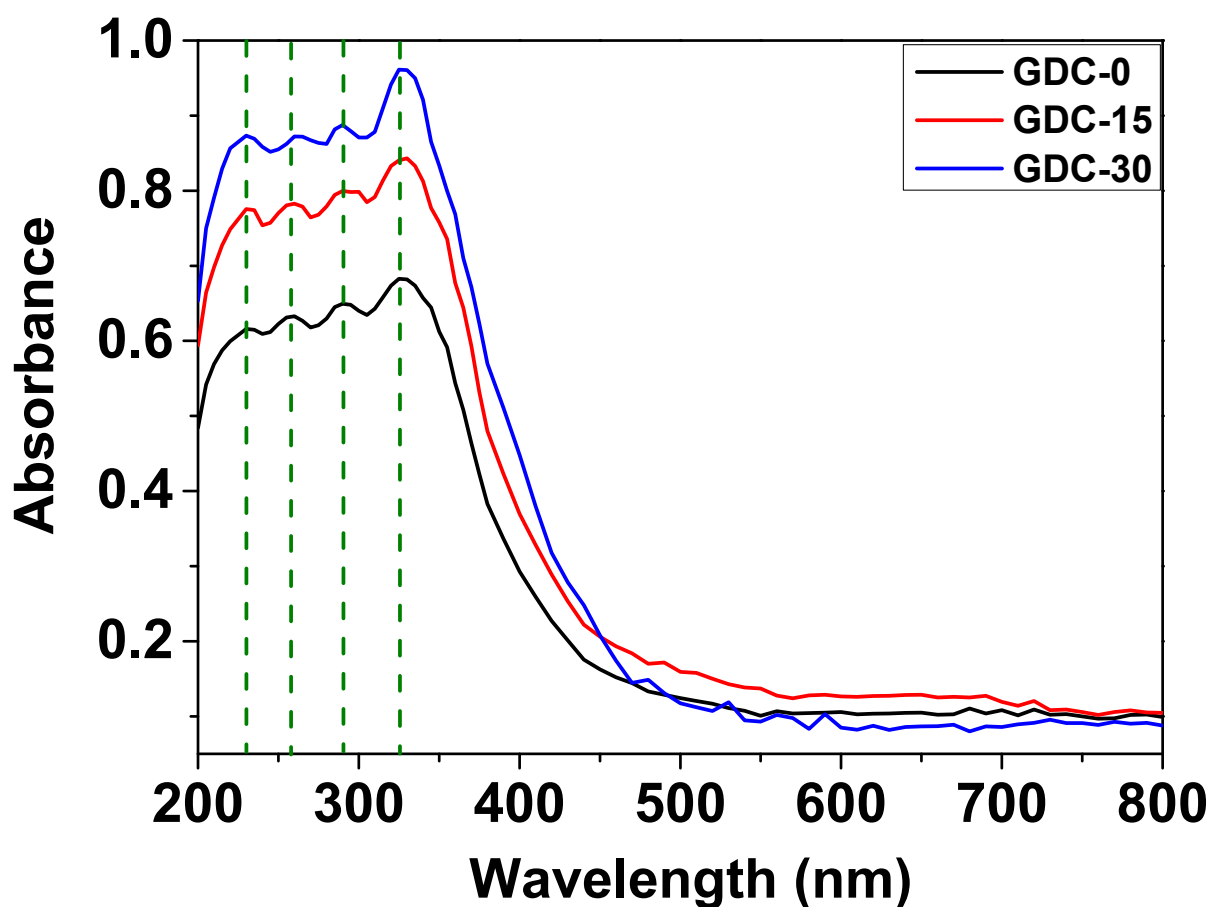

Figure S3: UV-vis diffuse reflectance spectra of GDC-0, GDC-15 and GDC-30 samples.

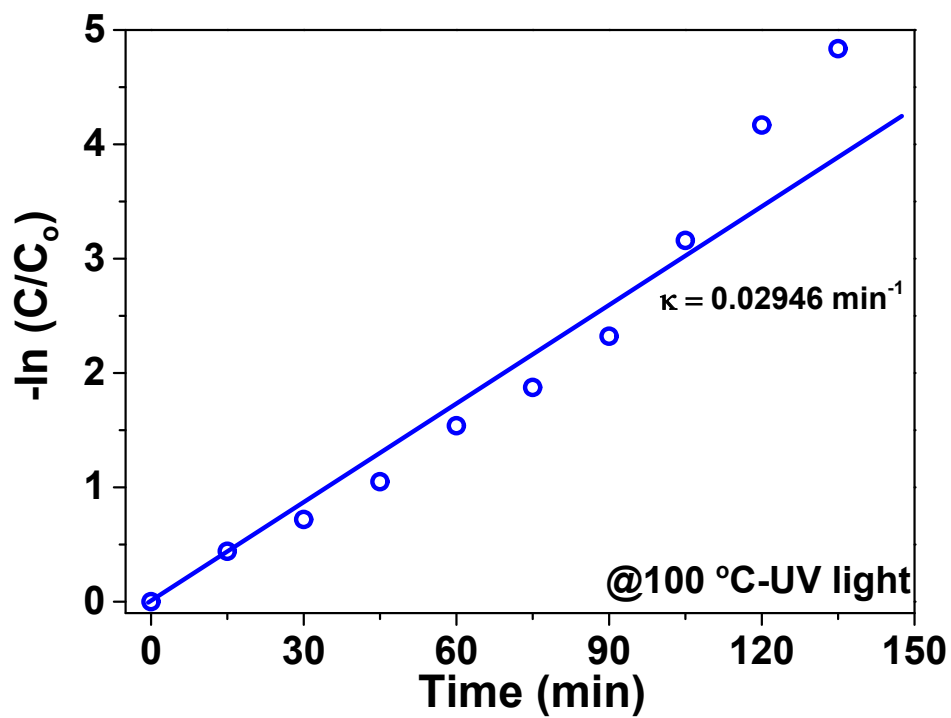

Figure S4: Plot of  $-\ln(C/C_0)$  vs irradiation time for GDC-15 at 100 °C under UV light

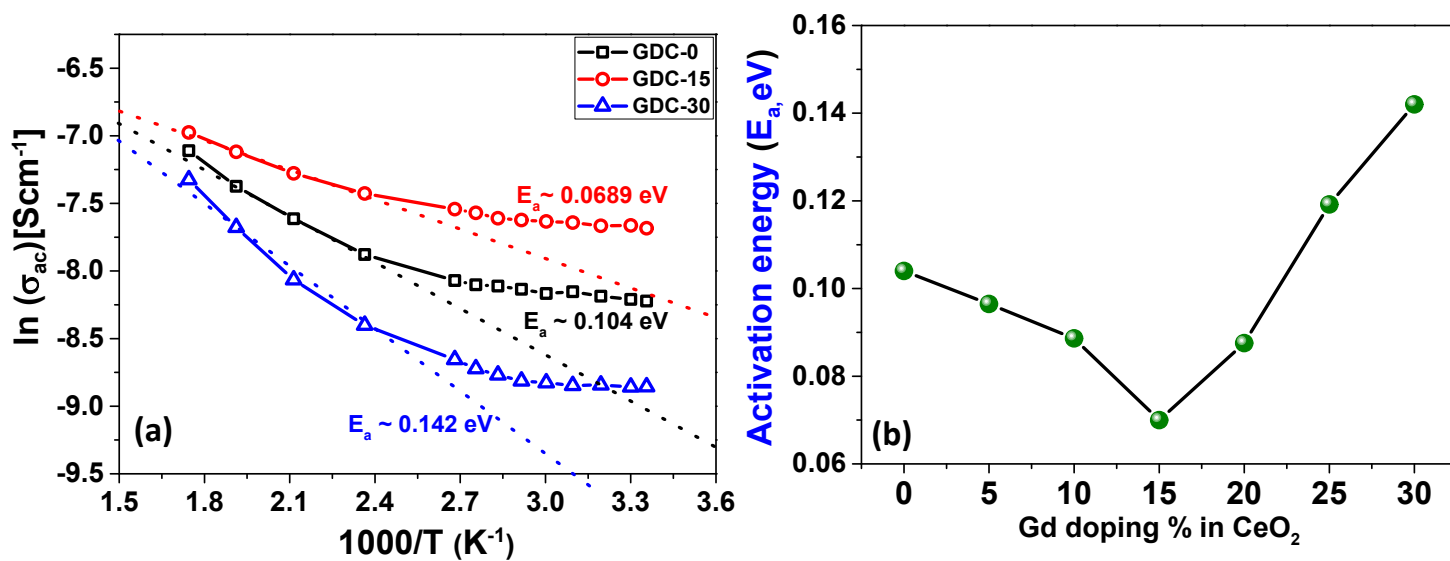

Figure S5: (a) Bulk ionic ac conductivity versus inverse temperature for GDC-0, GDC-15 and GDC-30 samples (b) Calculated activation energy values for all GDC-samples.

#### References:

1. Reddy, B.M., et al., *Structural Characterization and Catalytic Activity of Nanosized CexM1-xO2 (M = Zr and Hf) Mixed Oxides*. The Journal of Physical Chemistry C, 2008. **112**(31): p. 11729-11737.
